# Supplementary material for: Three-dimensional evaluation of postsurgical stability of Surgery-first approach in Skeletal Class III patients with two-jaw surgery and maxillary premolar extraction and study of the influencing factors.
Source: Research Square preprint supplement (doi:10.21203/rs.3.rs-1747703/v1), 2022-06-28
Supplement: Supplementary file 1 [file 359cdcf4065d4a838b0a50d6.xlsx]

## Sheet: Sheet1
Table 2. The mean values of skeletal postoperatively three-dimensional translational changes(millimeter, mm) on different time period. And p values of repeated measurement ANOVA among different time periods.
	Mean ± SD					P values	P values
measurements	T1T2	T2T3	T3T4	T1T3	T1T4	T1T2 vs T2T3 vs T3T4	T1T2 vs T1T3 vs T1T4
B point
Δ-VRP	2.31±1.81	0.20±1.13	0.48±0.54	2.39±1.62	3.02±1.39	<0.001*	0.020*
Δ-HRP	2.75±1.71	0.74±1.28	0.57±0.89	3.42±1.98	3.97±1.65	<0.001*	0.397
Δ-MSP	-0.32±1.00	0.06±0.57	-0.13±0.72	-0.03±1.12	-0.19±1.20	0.43	<0.001*
A point
Δ-VRP	-0.58±1.72	-0.29±0.92	-0.11±0.49	-0.87±0.85	-1.01±0.75	0.083	<0.001*
Δ-HRP	0.19±1.72	0.05±2.23	0.11±1.64	0.28±2.05	0.48±1.26	0.895	0.012*
Δ-MSP	0.11±0.44	0.17±0.39	-0.11±0.37	0.28±0.54	0.14±0.52	0.155	0.361
PNS point
Δ-VRP	0.12±0.60	-0.05±0.41	0.04±0.33	0.13±0.57	0.11±0.55	0.784	0.716
Δ-HRP	0.75±0.76	-0.10±0.53	0.05±0.41	0.63±0.65	0.70±0.73	0.001*	0.498
Δ-MSP	0.07±0.38	0.00±0.62	0.02±0.49	0.04±0.59	0.03±0.53	0.877	0.976
Abbreviations: SD, standard deviation; Δ-HRP, the sagittal translational changes; Δ-VRP, the vertical translational changes; Δ-MSP, the horizontal translational changes；
Displacements towards anteriorly, superiorly and to the nondeviated site were set as positive.
*Statistically significant difference of Repeated measurement ANOVA, with a significant level of 5%.
