# Supplementary material for: Three-dimensional evaluation of postsurgical stability of Surgery-first approach in Skeletal Class III patients with two-jaw surgery and maxillary premolar extraction and study of the influencing factors.
Source: Research Square preprint supplement (doi:10.21203/rs.3.rs-1747703/v1), 2022-06-28
Supplement: Supplementary file 2 [file 7a17bcd9b011f2c7aaefebd6.xlsx]

## Sheet: Sheet1
Table 1. Measurements used in this study.
Abbrevations	Measurements	Definitions
Condyle and coronoid process
C-VRP/Cp-VRP(mm)	Condyle/Coronoid process sagittal position	Distance from the center of condyle head(C, midpoint between condylion lateralis and medialis) /the tip of coronoid process(Cp) to the VRP.
C-HRP/Cp-HRP(mm)	Condyle/Coronoid process vertical position	Distance from the center of C/Cp to the HRP.
C-MSP/Cp-MSP(mm)	Condyle / Coronoid process horizontal position	Distance from C/Cp to the MSP.
⊥Co-Sn(mm)	Condylar height	Vertical distance from the Condylion superius(Co) to Sigmoid notch(Sn)(horizontal plane passing through Sn).
⊥Cp-Sn(mm)	Coronoid process height	Vertical distance from the Cp to Sn(horizontal plane passing through Sn).
∠C-MSPz(°)	Condyle angle to the MSP in coronal view	Angle between the MSP and condylion lateralis and medialis connection, in coronal view.
∠C-MSPy(°)	Condyle angle to the MSP in frontal view	Angle between the MSP and condylion lateralis and medialis connection, in frontal view.
∠Co-Sn-FHz(°)	Condyle neck angle to the FH in sagittal view	Angle between the HRP and Co and Sn nnection, in sagittal view.
∠Co-Sn-FHx(°)	Condyle neck angle to the FH in frontal view	Angle between the HRP and Co and Sn connection, in frontal view.
∠Co-Cp-FHz(°)	Co-Cp angle to the FH, in sagittal view	Angle between the FH and Co and Cp connection, in sagittal view.
∠Co-Cp-FHx(°)	Co-Cp angle to the FH, in coronal view	Angle between the FH and Co and Cp connection, in coronal view.
Bimaxillary
B-VRP/A-VRP/PNS-VRP(mm)	Mandible/ anterior maxilla/posterior maxilla sagittal position	Distance from the mandibular B point / maxilla A point/ maxilla posterior nasal spine(PNS) to the VRP.
B-HRP/A-HRP/PNS-HRP(mm)	Mandible/anterior maxilla/posterior maxilla vertical position	Distance from the mandibular B point / maxilla A point/ maxilla posterior nasal spine(PNS) to the HRP.
B-MSP/A-MSP/PNS-MSP (mm)	Mandible/anterior maxilla/posterior maxilla vertical position	Distance from the mandibular B point / maxilla A point/ maxilla posterior nasal spine(PNS) to the MSP.
Dental
VD(mm)	Occlusal vertical dimension	Vertical distance between the bimaxillary first molar mesial buccal cusp(U6c/L6c).
OJ(mm)	Overjet	Horizontal distance between the midpoints of bimaxillary bilateral incisor edge.
OB(mm)	Overbite	Vertical distance between the midpoints of bimaxillary bilateral incisor edge.
Archwidth(mm)	Maxillary posterior archwidth	Distance between bilateral U6c.
∠OP-FHz(°)	Occlusal plane angle to FH, in sagittal view	Angle between occlusal plane(a plane passing through bilateral U6c and the midpoint of bilateral U1c) to FH, in sagittal view.
∠OP-FHx(°)	Occlusal plane angle to FH, in frontal view	Angle between occlusal plane to FH, in frontal view.
∠U1-FH/∠L1-FH/∠U6-FH(°)	Maxillary incisor/mandibualr incisor/Maxillary first molar inclination	Angle between FH and maxillary incisor edge(U1c) and root apex connection(U1a)/mandibular incisor edge(L1c) and root apex connection(L1a)/maxillary first molar mesial buccal cusp (U6c)and root apex(U6a) connection, in sagittal view.
U1-VRP/U6c-VRP(mm)	Maxillary incisor/ first molar sagittal position	Distance from the U1c/U6c to VRP plane.
U6c-HRP/U6pal-HRP/U7c-HRP/U7pal-HRP(mm)	Maxillay incisor/ first and second molar mesial buccal cusp/mesial palatal cusp(U6pal, U7pal) vertical height	Distance from the U6c, U6pal, U7c and U7pal to the HRP.
U6 torque/U7 torque(°)	Maxillary first and second molar torque	Angle between FH and maxillary first/ second molar mesial buccal cusp (U6c/U7c)and root apex(U6a/U7a) connection, in frontal view.
