# Supplementary material for: Three-dimensional evaluation of postsurgical stability of Surgery-first approach in Skeletal Class III patients with two-jaw surgery and maxillary premolar extraction and study of the influencing factors.
Source: Research Square preprint supplement (doi:10.21203/rs.3.rs-1747703/v1), 2022-06-28
Supplement: Supplementary file 3 [file c5fd46608a75d93c782afa2a.xlsx]

## Sheet: Sheet1
Table 5. Comparison of the postsurgically orthodontic changes between Group 1 and 2.
Mean ± SD (millimeters for linear measurements/degree for angular measurement)
Measurements	T1T2			T2T3			T3T4			T1T3			T1T4
	Group 1	Group 2	P value	Group 1	Group 2	P value	Group 1	Group 2	P value	Group 1	Group 2	P value	Group 1	Group 2	P value
ΔVD	0.83±0.75	2.25±1.42	0.028*	0.19±0.29	-0.07±0.36	0.071	0.41±0.64	-0.12±0.27	0.025*	1.02±0.75	2.61±1.00	0.007*	1.16±0.75	2.61±1.04	0.15
ΔOJ	-1.73±1.32	-5.10±1.92	0.004*	-1.16±1.68	-0.53±0.66	0.298	-0.22±0.61	-0.72±0.70	0.848	-2.89±1.64	-5.46±1.76	0.081	-3.42±1.81	-5.68±1.71	0.337
ΔOB	1.17±1.76	3.78±1.02	0.015*	0.08±1.27	-0.37±1.05	0.699	-0.79±1.11	-1.28±0.82	1.000	1.25±1.58	3.24±0.90	0.039*	0.75±2.06	2.03±0.76	0.078
ΔArchwidth	-0.63±1.63	-0.22±1.94	0.487	-1.42±1.88	-0.71±0.51	0.519	-0.58±2.08	-1.10±1.32	0.584	-2.04±2.58	-1.40±1.88	0.439	-2.70±2.81	-1.64±1.77	0.423
Δ∠U1-FH	0.61±2.68	-4.00±3.89	0.028*	0.71±3.03	4.08±10.36	0.796	1.97±4.15	-1.32±2.32	0.201	1.31±3.99	0.44±10.44	0.699	3.01±5.28	-3.90±9.16	0.15
ΔU1-VRP	0.19±1.18	-1.24±0.96	0.037*	-0.61±1.10	-0.20±1.67	0.897	-0.40±1.63	-2.38±0.51	0.201	-0.41±1.63	-1.35±1.86	0.622	-0.63±2.15	-3.44±2.85	0.078
Δ∠L1-FH	4.10±3.88	3.22±4.64	0.643	1.84±7.72	-0.33±3.75	0.366	2.58±4.40	-0.21±2.51	0.136	5.75±7.40	3.85±4.77	0.439	9.40±8.19	1.70±0.61	0.025*
ΔU6c-VRP	0.13±0.36	0.38±0.34	0.298	0.47±0.99	0.24±0.44	0.489	0.12±0.97	1.09±1.56	0.584	0.70±1.48	0.00±0.60	0.245	1.14±2.05	0.76±0.99	0.709
ΔU6c-HRP	0.13±0.36	0.38±0.34	0.298	0.46±0.61	0.65±0.69	0.519	0.00±0.50	0.01±0.08	1.000	0.59±0.50	0.91±0.79	0.302	0.39±0.62	0.57±0.84	0.423
ΔU6pal-HRP	0.34±0.30	0.75±0.31	0.028*	0.69±0.55	0.28±0.43	0.302	-0.02±0.15	-0.06±0.27	0.465	1.03±0.70	1.06±0.62	0.699	0.78±0.73	0.78±0.51	1.000
ΔU6 torque	0.70±2.24	0.56±3.28	0.563	1.46±2.20	1.15±1.42	0.897	-1.80±4.10	1.47±3.44	0.559	2.16±3.91	2.86±2.89	0.699	0.69±6.22	3.54±3.59	0.262
Δ∠U6-FH	0.08±3.45	-0.66±2.65	0.487	0.81±2.59	0.14±3.11	0.796	-2.25±2.47	0.01±0.54	0.201	0.88±4.31	-1.10±5.10	0.186	-0.53±4.34	-2.22±5.09	0.20
ΔU7c-HRP	-0.29±0.50	0.58±0.24	0.010*	0.17±0.68	0.32±0.50	0.769	-0.03±0.47	-0.18±0.33	0.831	-0.12±0.87	0.93±0.52	0.028*	-0.32±1.15	0.79±0.66	0.144
ΔU7pal-HRP	0.18±0.71	1.10±0.51	0.039*	0.42±0.81	0.24±0.42	1.000	-0.28±0.33	-0.31±0.34	0.522	0.60±0.89	1.47±0.57	0.057	0.19±0.92	1.14±0.64	0.273
ΔU7 torque	3.90±2.80	4.44±1.50	0.699	1.90±4.58	1.88±2.79	0.661	0.53±4.61	-0.97±2.30	0.394	5.79±5.91	6.24±4.10	0.558	6.98±7.37	2.90±4.04	0.273
Note linear values towards anteriorly and superiorly were set as positive. Anterior inclination and palatal torque were set as positive.
*Statistically significance with a significant level of 5%.
