# Supplementary material for: Three-dimensional evaluation of postsurgical stability of Surgery-first approach in Skeletal Class III patients with two-jaw surgery and maxillary premolar extraction and study of the influencing factors.
Source: Research Square preprint supplement (doi:10.21203/rs.3.rs-1747703/v1), 2022-06-28
Supplement: Supplementary file 4 [file e9ca9188f52803e7be1d958e.xlsx]

## Sheet: Sheet1
Table 3. Comparison of presurgical(T0) skeletal and dental morphology between Group 1 and 2.
Mean ± SD (millimeters for linear measurements/degree for angular measurement)
Measurements	Group 1(n=8)	Group 2(n=7)	P value
Condyle
C-VRP	62.30±3.10	63.42±1.98	0.132
C-HRP	8.00±1.25	7.23±2.61	0.817
C-MSP	51.90±2.59	54.30±2.98	0.335
⊥Co-Sn	19.30±3.31	21.59±3.10	0.355
∠C-MSPz	79.98±7.22	78.35±4.35	0.418
∠C-MSPy	85.43±3.11	79.42±6.46	0.028*
∠Co-Sn-FHz	46.03±5.39	46.98±3.70	0.298
∠Co-Sn-FHx	90.49±4.76	88.92±3.27	0.355
Coronoid process
Cp-VRP	29.98±3.92	28.04±2.34	0.418
Cp-HRP	9.28±3.69	8.07±3.22	0.478
Cp-MSP	50.09±3.44	50.68±2.07	0.817
⊥Cp-Sn	10.39±1.18	13.81±2.50	0.011*
∠Co-Cp-FHz	14.87±6.53	13.34±6.38	0.563
∠Co-Cp-FHx	89.18±3.67	87.58±2.69	0.247
Bimaxillary
B-VRP	19.03±4.84	20.17±1.91	0.728
B-HRP	72.35±6.90	70.32±3.98	0.418
B-MSP	4.49±3.60	1.62±0.92	0.203
A-VRP	10.39±2.37	11.43±2.61	0.817
A-HRP	32.70±5.50	29.56±7.78	0.563
A-MSP	0.67±0.67	0.98±0.65	0.224
PNS-VRP	35.08±3.18	34.25±2.58	0.643
PNS-HRP	26.06±3.05	20.54±6.46	0.037*
PNS-MSP	0.64±0.71	0.40±0.34	0.602
Dental
VD	-0.57±0.74	-1.45±1.35	0.118
OJ	-2.30±3.14	-2.69±2.67	0.728
OB	0.60±2.66	0.34±1.85	1.000
Archwidth	56.48±4.77	57.65±2.52	0.355
∠U1-FH	120.43±8.57	121.12±5.22	0.332
∠L1-FH	80.53±5.72	78.36±5.44	0.488
∠OP-FHz	8.38±6.44	6.13±2.12	0.817
∠OP-FHx	1.24±0.77	1.26±1.15	0.728
*Statistically Significance with a significant level of 5%.
