# Supplementary material for: Three-dimensional evaluation of postsurgical stability of Surgery-first approach in Skeletal Class III patients with two-jaw surgery and maxillary premolar extraction and study of the influencing factors.
Source: Research Square preprint supplement (doi:10.21203/rs.3.rs-1747703/v1), 2022-06-28
Supplement: Supplementary file 5 [file edafbb30312bb460fac582e9.xlsx]

## Sheet: Sheet1
Table 4. Comparison of skeletal and dental morphology(T1) and surgical-related changes(Δ:T0T1) of between Group 1 and 2.
Mean ± SD (millimeters for linear measurements/degree for angular measurement)
Measurements	Group 1(Δ)	Group 2(Δ)	P value	P value(Δ)
Condyle
C-VRP	62.30±3.23(0.00±0.54)	63.85±2.22(-0.54±0.68)	0.355	0.247
C-HRP	8.99±1.21(-0.99±0.59)	8.26±2.90(-0.80±0.59)	1.000	0.487
C-MSP	52.69±2.47(-0.18±0.71)	55.13±3.32(0.02±0.35)	0.132	0.908
∠C-MSPz	79.98±7.22(0.70±2.69)	78.35±4.35(0.07±1.34)	0.487	0.487
∠ C-MSPy	84.96±3.72(2.40±2.79)	80.20±4.85(0.59±1.39)	0.028*	0.132
∠Co-Sn-FHz	48.58±5.64(2.55±1.36)	51.85±3.82(4.87±1.29)	0.105	0.021*
∠Co-Sn-FHx	87.59±5.17(-2.74±2.74)	86.89±3.93(-1.68±2.62)	0.728	0.418
Coronoid process
Cp-VRP	30.34±4.28(-0.39±0.68)	29.19±2.13(-1.07±0.71)	1.000	0.132
Cp-HRP	12.12±4.04(-2.84±1.24)	10.52±3.62(-3.38±1.02)	0.728	0.643
Cp-MSP	49.08±2.64(0.83±1.30）	48.84±2.60(0.59±1.03)	0.728	0.418
∠Co-Cp-FHz	17.88±6.83(3.01±2.06)	18.22±5.80(4.88±0.75)	0.728	0.064
∠Co-Cp-FHx	85.69±2.91(1.71±2.00)	83.18±4.29(1.46±1.94)	0.728	0.908
Bimaxillary
B-VRP	12.43±4.12(-6.61±3.32)	9.71±0.91(-10.46±1.62)	0.074	0.021*
B-HRP	72.58±6.24(-0.23±2.53)	71.16±6.02(-2.24±1.27)	0.728	0.064
B-MSP	-0.25±2.03(3.95±2.85)	1.73±1.61(2.67±1.17)	0.105	0.355
A-VRP	14.89±3.08(4.50±1.26)	15.31±1.40(3.88±1.95)	0.908	0.563
A-HRP	32.65±5.46(0.05±1.90)	29.95±7.13(-0.39±1.41)	0.563	0.487
A-MSP	-0.55±1.47(-0.28±1.65)	0.53±2.13(-0.25±1.96)	0.643	0.817
PNS-VRP	31.10±3.64(3.97±1.12)	32.19±4.89(4.65±0.97)	0.817	0.183
PNS-HRP	25.74±2.97(0.38±1.29)	19.34±6.24(1.19±1.78)	0.015*	0.728
PNS-MSP	0.12±0.80(0.09±1.08)	0.21±0.93(-0.13±1.05)	0.487	0.643
Dental
VD	-0.70±0.48(-0.13±0.73)	-2.33±1.75(-0.87±1.54)	0.037*	0.083
OJ	5.96±1.31(8.26±3.49)	9.31±1.86(12.00±2.14)	0.049*	0.083
OB	0.76±2.01(0.16±2.59)	-0.85±1.27(-1.19±1.13)	0.049*	0.028*
Archwidth	55.15±.48(-1.32±3.23)	56.88±3.06(-0.77±3.01)	0.643	0.908
∠U1-FH	112.95±4.53(-7.48±5.47)	117.13±5.41(-3.99±4.11)	0.105	0.247
∠L1-FH	79.65±6.59	75.40±6.63	0.203	-
∠OP-FHz	9.72±4.82(-1.34±3.82)	9.66±3.55(-3.53±3.06)	0.728	0.355
∠OP-FHx	0.75±0.76(1.40±1.50)	1.30±1.43(1.27±1.92)	0.418	1.000
Note linear values toward anteriorly, superiorly and to the nondeviated site were set positive, angular values for anterior rotation and toward nondeviated site were set as positive.
*Statistically significance with a significant level of 5%.
