# Supplementary material for: Three-dimensional evaluation of postsurgical stability of Surgery-first approach in Skeletal Class III patients with two-jaw surgery and maxillary premolar extraction and study of the influencing factors.
Source: Research Square preprint supplement (doi:10.21203/rs.3.rs-1747703/v1), 2022-06-28
Supplement: Supplementary file 6 [file ee4d7efbcddc13558dc44932.xlsx]

## Sheet: Sheet1
Table 6. Significantly correlated variables with the extent of postsurgical mandibular sagittal and vertical relapse(ΔB-VRP of T1T4) using Pearson correlation test .
Variables	time	Mean±SD	R	P Value
Presurgical/Immediate postsurgical
⊥Co-Sn	T0	11.84±2.11	0.512	0.018
B-HRP	T0	70.30±5.38	-0.437	0.048
PNS-HRP	T0	23.76±4.57	-0.419	0.042
	T1	23.35±4.72	-0.494	0.023
VD	T0	-0.97±1.05	-0.505	0.02
	T1	-1.68±.47	-0.493	0.023
Surgical related
∠Co-Sn-FHz	T0T1	3.72±1.51	0.513	0.017
Δ∠Co-Cp-FHz	T0T1	4.21±1.68	0.484	0.026
ΔB-VRP	T0T1	-8.65±3.11	-0.526	0.014
ΔB-HRP	T0T1	-1.94±2.44	-0.592	0.005
ΔA-HRP	T0T1	-0.90±2.07	-0.528	0.014
Orthodontics related
ΔVD	T1T2	1.72±1.28	0.494	0.032
	T2T3	-0.13±0.59	-0.542	0.02
	T3T4	0.14±0.73	-0.444	0.044
Δ∠L1-FH	T1T4	5.00±7.12	-0.503	0.02
ΔU6c-VRP	T2T3	0.35±0.74	-0.534	0.023
	T1T3	0.16±1.08	-0.592	0.006
ΔU7c-HRP	T1T2	0.17±0.57	0.629	0.005
	T1T3	0.25±0.76	0.588	0.008
ΔU7pal-HRP	T1T3	0.91±0.71	0.487	0.035
